# Supplementary material
Source: Springer Nature journal article supplement (https://www.springermedizin.de/resource/supplementary/12883_2010_427_MOESM1_ESM.pdf/9455422)
Supplement: MOESM1 [file 9455422]

Reference population: 600.000 (SIAP system)

```
graph TD; A[Reference population: 600.000 (SIAP system)] --> B[PERART study initial random sample: 3010 sbj >50 years (23):  
• Frammingham/REGICOR functions calculation  
• AAI measurement]; B --> C[ASIA sample: 1503 sbj meeting criteria:  
• REGICOR>5 or Frammingham>10  
• No history of CD/stroke  
• No disability]; C --> D[Recruitment phase: phone contact (up to five calls in each patient) to accept participation in baseline visit at our centre.]; D --> E[Baseline visit: Reassessment of inclusion criteria and signing of informed written consent];
```

PERART study initial random sample: 3010 sbj >50 years (23):

- Frammingham/REGICOR functions calculation
- AAI measurement

ASIA sample: 1503 sbj meeting criteria:

- REGICOR>5 or Frammingham>10
- No history of CD/stroke
- No disability

Recruitment phase: phone contact (up to five calls in each patient) to accept participation in baseline visit at our centre.

Baseline visit: Reassessment of inclusion criteria and signing of informed written consent
